# Supplementary material
Source: publisher figshare collection journal article supplement (https://frontiersin.figshare.com/ndownloader/files/23769674)
Supplement: Supplementary file [file 23769674]

## *Supplementary Material*

### **Nitrogen-to-Protein Conversion Factors for Edible Insects on the Swiss Market: *T. molitor*, *A. domesticus*, and *L. migratoria***

**Samy Boulos, Anina Tännler and Laura Nyström\***

*Laboratory of Food Biochemistry, Institute of Food, Nutrition and Health, Department of Health Sciences and Technology, ETH Zurich, 8092 Zurich, Switzerland.*

**\* Correspondence:** Laura Nyström: [laura.nystroem@hest.ethz.ch](mailto:laura.nystroem@hest.ethz.ch)

#### **Supplementary Equations, Tables & Figures**

- Equations for error propagation      Page 2
- Tables S1–S5      Page 3
- Figures S1–S3      Page 7

## Equations for error propagation

Standard deviations of averages calculated from other averages that already have a standard deviation (e.g. averaged AA composition of the three insect species) were calculated taking the quadrature of the internal ( $SD_{int}$ ) and external standard deviation ( $SD_{ext}$ ) (see Eq. (S1)).

$$(S1) \quad SD_{tot} = \sqrt{SD_{int}^2 + SD_{ext}^2}$$

$SD_{int}$  is calculated according to Eq. (S2) from the equally weighted standard deviations of the individual averages ( $SD_i$ ), with  $n$  = number of averages being averaged (e.g. for the average of the three insect species,  $n = 3$ ).  $SD_{ext}$  is calculated as a usual standard deviation from the individual averages  $x_i$  and the overall average  $\bar{x}$  (Eq. (S3)).

$$(S2) \quad SD_{int} = \sqrt{\sum_{i=1}^n \left(\frac{1}{n} SD_i\right)^2}$$

$$(S3) \quad SD_{ext} = \sqrt{\frac{\sum_{i=1}^n (x_i - \bar{x})^2}{n-1}}$$

Standard deviations of quantities derived from multiplication or division of measured averages are calculated according to classical error propagation (assuming no correlation of errors) (Ku 1966). E.g. for  $k_p = \text{protein}/N$ , the standard deviation would be:

$$(S4) \quad SD_{k_p} = k_p \sqrt{\left(\frac{SD_{\text{Protein}}}{\text{Protein}}\right)^2 + \left(\frac{SD_N}{N}\right)^2}$$

Standard deviations of quantities derived from addition or subtraction of measured averages are calculated according to classical error propagation (assuming no correlation of errors) (Ku 1966). E.g. for  $N_{\text{protein+chitin}} = N_{\text{protein}} + N_{\text{chitin}}$ ,<sup>1</sup> the standard deviation would be:

$$(S5) \quad SD_{N_{\text{protein+chitin}}} = \sqrt{(SD_{N_{\text{protein}}})^2 + (SD_{N_{\text{chitin}}})^2}$$

## Reference

Ku, H.H. (1966). Notes on the Use of Propagation of Error Formulas, *J. Research of National Bureau of Standards-C. Engineering and Instrumentation* 70C(4): 263–273. doi:10.6028/jres.070c.025.

---

<sup>1</sup> E.g. calculated to compare with  $N_{total}$  for significant differences to determine if other nitrogen species ( $N_{other}$ ) are relevant.

## Tables S1–S5

**Table S1:** Total chitin, nitrogen, true protein content (all on dwb), and protein overestimation [%] when using the generally used  $6.25 \times N_{total}$  for blanched insect samples from different breeders (illustrated in **Figure 2**).

| Insect species                                 | Batch/<br>breeder | Chitin<br>[g/100 g insect] | Total nitrogen<br>[g/100 g insect] | True protein<br>[g/100 g insect] | Overestimated<br>protein content [%] <sup>a</sup> |
|------------------------------------------------|-------------------|----------------------------|------------------------------------|----------------------------------|---------------------------------------------------|
| <i>T. molitor</i><br>(mealworms)               | M1                | 4.0 (±0.1)                 | 9.4 (±0.2)                         | 50.4 (±0.6)                      | 16.0 (±0.4)                                       |
|                                                | M2                | 4.1 (±0.2)                 | 9.7 (±0.2)                         | 52.3 (±0.8)                      | 16.3 (±0.4)                                       |
|                                                | M3a               | 4.6 (±0.2)                 | 9.6 (±0.1)                         | 51.3 (±0.2)                      | 16.3 (±0.2)                                       |
|                                                | M3b               | 4.5 (±0.2)                 | 9.1 (±0.2)                         | 49.7 (±0.4)                      | 13.8 (±0.3)                                       |
| <i>A. domesticus</i><br>(crickets)             | C1                | 4.9 (±0.4)                 | 10.4 (±0.2)                        | 55.2 (±1.1)                      | 18.0 (±0.5)                                       |
|                                                | C2                | 3.9 (±0.3)                 | 10.5 (±0.3)                        | 54.3 (±0.3)                      | 20.3 (±0.5)                                       |
| <i>L. migratoria</i> <sup>b</sup><br>(locusts) | body              | 4.4 (±0.3)                 | 8.2 (±0.03)                        | 44.8 (±0.7)                      | 14.8 (±0.2)                                       |
|                                                | wings+<br>legs    | 11.7 (±1.5)                | 12.2 (±0.1)                        | 58.9 (±0.6)                      | 29.8 (±0.4)                                       |
|                                                | whole             | 5.1 (±0.3)                 | 8.7 (±0.03)                        | 46.6 (±0.6)                      | 17.1 (±0.2)                                       |

<sup>a</sup> Overestimation is calculated as  $(\text{crude protein}/\text{true protein}) - 100\% = ((6.25 \times N_{total})/\Sigma[\text{AAR}_i]) - 100\%$ .

<sup>b</sup> Locust main body weight fraction (dwb) was 87.3%, whereas wings+legs were the remaining 12.7%. Whole locust data was calculated by weighted average of the body $\times$ 87.3% + (wings+legs) $\times$ 12.7%.

**Table S2:** Amino acid (AA) composition [g/100 g true protein] of blanched mealworms (*T. molitor*), crickets (*A. domesticus*) and locusts (*L. migratoria*) from different batches/ breeders.<sup>a</sup>

| AA residue<br>[g/100 g true<br>protein] | <i>T. molitor</i> (mealworms) |               |               |               | <i>A. domesticus</i> (crickets) |               | <i>L. migratoria</i> (locusts) <sup>b</sup> |              |               |
|-----------------------------------------|-------------------------------|---------------|---------------|---------------|---------------------------------|---------------|---------------------------------------------|--------------|---------------|
|                                         | M1                            | M2            | M3a           | M3b           | C1                              | C2            | body                                        | wings+legs   | whole         |
| *His                                    | 4.35 (±0.07)                  | 3.83 (±0.28)  | 3.94 (±0.10)  | 4.49 (±0.07)  | 3.04 (±0.27)                    | 3.15 (±0.40)  | 3.07 (±0.39)                                | 3.57 (±0.28) | 3.13 (±0.34)  |
| *Ile                                    | 5.07 (±0.09)                  | 4.89 (±0.44)  | 4.99 (±0.19)  | 5.46 (±0.05)  | 4.56 (±0.40)                    | 4.77 (±0.44)  | 4.96 (±0.15)                                | 4.65 (±0.56) | 4.92 (±0.15)  |
| *Leu                                    | 8.19 (±0.07)                  | 7.90 (±0.39)  | 7.89 (±0.18)  | 8.23 (±0.09)  | 7.90 (±0.35)                    | 8.02 (±0.53)  | 8.52 (±0.03)                                | 8.63 (±0.32) | 8.53 (±0.05)  |
| *Lys                                    | 6.41 (±0.25)                  | 5.89 (±0.82)  | 6.10 (±0.48)  | 6.61 (±0.04)  | 6.09 (±0.63)                    | 5.98 (±0.67)  | 6.11 (±0.21)                                | 3.92 (±0.65) | 5.83 (±0.2)   |
| *Met                                    | 0.67 (±0.07)                  | 1.26 (±0.42)  | 1.76 (±0.35)  | 0.83 (±0.05)  | 2.05 (±0.73)                    | 1.82 (±0.83)  | 1.70 (±0.03)                                | 0.77 (±0.23) | 1.58 (±0.04)  |
| *Phe                                    | 4.58 (±0.04)                  | 3.84 (±0.63)  | 4.04 (±0.34)  | 4.29 (±0.02)  | 3.76 (±0.55)                    | 4.00 (±0.59)  | 3.90 (±0.06)                                | 2.31 (±0.51) | 3.70 (±0.08)  |
| *Thr                                    | 3.72 (±0.07)                  | 4.04 (±0.30)  | 4.13 (±0.15)  | 3.89 (±0.32)  | 3.99 (±0.25)                    | 4.08 (±0.24)  | 3.95 (±0.05)                                | 3.11 (±0.04) | 3.85 (±0.04)  |
| *Trp                                    | 0.97 (±0.02)                  | 1.07 (±0.04)  | 1.09 (±0.01)  | 1.05 (±0.01)  | 0.85 (±0.06)                    | 0.95 (±0.02)  | 0.83 (±0.03)                                | 0.32 (±0.02) | 0.76 (±0.02)  |
| *Val                                    | 6.96 (±0.10)                  | 6.53 (±0.46)  | 6.60 (±0.24)  | 7.16 (±0.07)  | 6.11 (±0.43)                    | 6.04 (±0.34)  | 6.56 (±0.13)                                | 8.57 (±0.58) | 6.81 (±0.14)  |
| *Cys                                    | 0.72 (±0.03)                  | 0.82 (±0.13)  | 1.09 (±0.30)  | 0.91 (±0.05)  | 1.01 (±0.29)                    | 0.97 (±0.17)  | 0.79 (±0.10)                                | 0.97 (±0.04) | 0.81 (±0.08)  |
| *Tyr                                    | 7.74 (±0.07)                  | 7.12 (±0.36)  | 8.05 (±0.20)  | 8.27 (±0.06)  | 6.15 (±0.21)                    | 5.75 (±0.28)  | 5.65 (±0.11)                                | 6.96 (±0.02) | 5.82 (±0.09)  |
| Ala                                     | 7.42 (±0.04)                  | 7.56 (±0.14)  | 7.18 (±0.20)  | 6.94 (±0.11)  | 8.53 (±0.30)                    | 7.40 (±0.28)  | 9.76 (±0.29)                                | 15.7 (±0.74) | 10.51 (±0.27) |
| Arg                                     | 6.04 (±0.03)                  | 6.64 (±0.09)  | 6.17 (±0.10)  | 6.30 (±0.27)  | 7.99 (±0.07)                    | 8.19 (±0.18)  | 7.38 (±0.17)                                | 6.42 (±0.36) | 7.26 (±0.15)  |
| Asx (Asn+Asp)                           | 7.98 (±0.10)                  | 8.09 (±0.99)  | 8.23 (±0.27)  | 8.09 (±0.09)  | 8.82 (±0.57)                    | 9.78 (±0.64)  | 8.13 (±0.09)                                | 5.68 (±0.27) | 7.82 (±0.08)  |
| Glx (Gln+Glu)                           | 10.75 (±0.38)                 | 12.16 (±0.99) | 11.28 (±0.26) | 10.99 (±0.56) | 11.87 (±0.68)                   | 11.82 (±0.59) | 11.35 (±0.49)                               | 7.69 (±0.49) | 10.89 (±0.43) |
| Gly                                     | 5.27 (±0.06)                  | 5.06 (±0.24)  | 4.88 (±0.12)  | 4.96 (±0.07)  | 4.98 (±0.10)                    | 4.79 (±0.19)  | 5.63 (±0.18)                                | 6.85 (±0.07) | 5.78 (±0.15)  |
| Pro                                     | 7.61 (±0.17)                  | 7.47 (±0.54)  | 7.23 (±0.12)  | 6.93 (±0.39)  | 6.82 (±0.54)                    | 6.37 (±0.34)  | 7.40 (±1.00)                                | 9.31 (±0.37) | 7.61 (±0.90)  |
| Ser                                     | 5.55 (±0.04)                  | 5.83 (±0.74)  | 5.36 (±0.32)  | 4.62 (±0.17)  | 5.47 (±0.78)                    | 6.09 (±0.67)  | 4.36 (±0.20)                                | 4.60 (±1.10) | 4.40 (±0.23)  |
| Degree of<br>amidation <sup>c</sup>     | 51 ± 3%                       | 49 ± 4%       | 45 ± 3%       | 53 ± 5%       | 63 ± 6%                         | 68 ± 5%       | 70 ± 3%                                     | 103 ± 6%     | 73 ± 3%       |

<sup>a</sup> Asterisk (\*) denotes essential and semi-essential amino acids.<sup>b</sup> For locusts, extremities (wings+legs) were analyzed separately from the main body part, and Whole locust data was calculated by weighted average of the body×87.3% + (wings+legs)×12.7%.<sup>c</sup> Degree of amidation [%] = (Asn+Gln)<sub>[mol]</sub> / (Asx+Glx)<sub>[mol]</sub> × 100%.

**Table S3:** Moisture & dry matter content [g/100 g fresh weight] of blanched insect samples.<sup>a</sup>

| Insect species                     | Breeder/ batch | Moisture content<br>[g/100 g insect, fresh weight] | Dry matter content<br>[g/100 g insect, fresh weight] |
|------------------------------------|----------------|----------------------------------------------------|------------------------------------------------------|
| <i>T. molitor</i><br>(mealworms)   | M1             | 57.8                                               | 42.2                                                 |
|                                    | M2             | 68.9                                               | 31.1                                                 |
|                                    | M3a            | 71.2                                               | 28.8                                                 |
|                                    | M3b            | 72.0                                               | 28.0                                                 |
| <i>A. domesticus</i><br>(crickets) | C1             | 70.4                                               | 29.6                                                 |
|                                    | C2             | 70.8                                               | 29.2                                                 |
| <i>L. migratoria</i><br>(locusts)  | Whole insect   | 65.1                                               | 34.9                                                 |

<sup>a</sup> Calculated from single batch weight changes during freeze drying, while taking into account the additional moisture content of the freeze-dried powders to get the total moisture and dry matter contents reported here. Hence, no standard deviation of the total moisture and dry matter contents can be given.

**Table S4:** Calculated protein recoveries & conversion factors  $k_p$  from literature crude protein ( $6.25 \times N_{total}$ ) and true protein data (sum of AA residues) of 9 insect orders taken from Table 1 in the review of Xiaoming *et al.* (2010). Overall mean  $k_p$  is reported with  $\pm$  its standard deviation.<sup>a</sup>

| Order                 | Crude Protein<br>(= $6.25 \times N$ ) | Total AA residues<br>( $\Sigma(AAR_i)$ ) | Protein recovery<br>(= $\Sigma(AAR_i)/$<br>crude protein) | $k_p$<br>(= recovery $\times 6.25$ ) |
|-----------------------|---------------------------------------|------------------------------------------|-----------------------------------------------------------|--------------------------------------|
| <b>Ephemeroptera</b>  | 66.26                                 | 65.97                                    | 99.6%                                                     | 6.22                                 |
| <b>Odonata</b>        | 58.83                                 | 46.03                                    | 78%                                                       | 4.89                                 |
| Isoptera              |                                       | 44.03                                    |                                                           |                                      |
| <b>Orthoptera</b>     | 44.1                                  | 38.87                                    | 88%                                                       | 5.51                                 |
| <b>Homoptera</b>      | 51.13                                 | 42.45                                    | 83%                                                       | 5.19                                 |
| <b>Hemiptera</b>      | 55.14                                 | 48.72                                    | 88%                                                       | 5.52                                 |
| <b>Coleoptera</b>     | 50.41                                 | 39.74                                    | 79%                                                       | 4.93                                 |
| <b>Magaloptera</b>    | 56.56                                 | 53.31                                    | 94%                                                       | 5.89                                 |
| <b>Lepidoptera</b>    | 44.91                                 | 32.88                                    | 73%                                                       | 4.58                                 |
| Diptera               | 59.39                                 |                                          |                                                           |                                      |
| <b>Hymenoptera</b>    | 47.81                                 | 45.18                                    | 94%                                                       | 5.91                                 |
| dry weight basis [%]  |                                       |                                          |                                                           |                                      |
| Mean Protein recovery |                                       |                                          |                                                           | mean $k_p$                           |
| 86%                   |                                       |                                          |                                                           | 5.40 ( $\pm 0.55$ )                  |

<sup>a</sup> Source: Text and numbers in black is data (average values) from Table 1 in review of Xiaoming, C., Ying, F., Hong, Z. and Zhiyong, C. (2010). "Review of the nutritive value of edible insects" in "Forest insects as food: humans bite back", *Proceedings of a workshop on Asia-Pacific resources and their potential for development*, pages 85-92. Text in blue indicates values calculated using the literature data.

**Table S5:** Separate analysis of protein, chitin, nitrogen, and conversion factors for locust main body and locust wings+legs, as well as the values for the whole insect calculated from the weighted averages.

| <b>Composition</b><br>[g/100 g insect, dwb] | Locust body<br>[87.3% (w/w)]        | Locust wings+legs<br>[12.7% (w/w)]  | Locust whole<br>[100% (w/w)]        |
|---------------------------------------------|-------------------------------------|-------------------------------------|-------------------------------------|
| Protein                                     | 44.82 ( $\pm 0.67$ )                | 58.94 ( $\pm 0.57$ )                | 46.61 ( $\pm 0.59$ )                |
| Chitin                                      | 4.14 ( $\pm 0.27$ )                 | 11.65 ( $\pm 1.52$ )                | 5.09 ( $\pm 0.31$ )                 |
| Total nitrogen ( $N_{total}$ )              | 8.23 ( $\pm 0.03$ )                 | 12.24 ( $\pm 0.14$ )                | 8.74 ( $\pm 0.03$ )                 |
| Amide nitrogen ( $N_{amide}$ )              | 0.69 ( $\pm 0.03$ )                 | 0.92 ( $\pm 0.03$ )                 | 0.72 ( $\pm 0.03$ )                 |
| Protein nitrogen ( $N_{protein}$ )          | 8.14 ( $\pm 0.11$ )                 | 10.94 ( $\pm 0.21$ )                | 8.50 ( $\pm 0.10$ )                 |
| Degree of amidation [%]                     | 70% ( $\pm 3\%$ )                   | 103% ( $\pm 6\%$ )                  | 73% ( $\pm 3\%$ )                   |
| $(N_{protein} + N_{chitin})/N_{total}$ [%]  | 102%                                | 96%                                 | 101% ( $\pm 1\%$ )                  |
| $k_A$                                       | 5.50 ( $\pm 0.11$ )                 | 5.39 ( $\pm 0.12$ )                 | 5.49 ( $\pm 0.09$ )                 |
| $k_P$                                       | <b>5.45 (<math>\pm 0.08</math>)</b> | <b>4.81 (<math>\pm 0.07</math>)</b> | <b>5.33 (<math>\pm 0.07</math>)</b> |

## Figures S1–S3

(A)

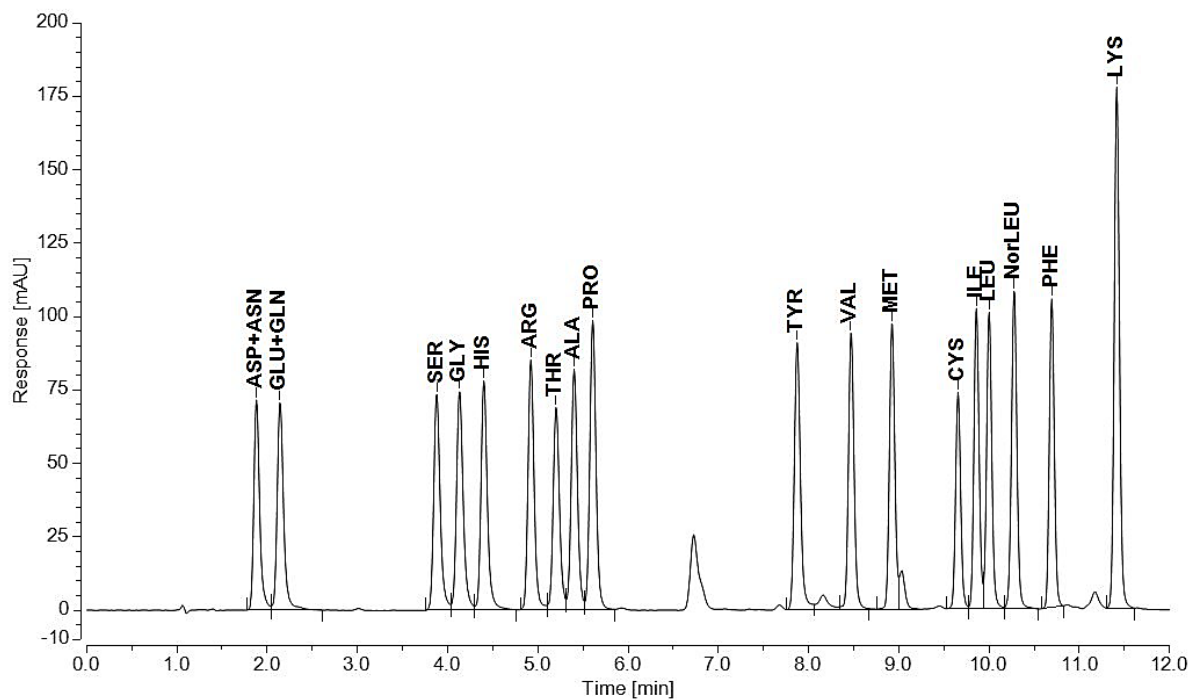

(B)

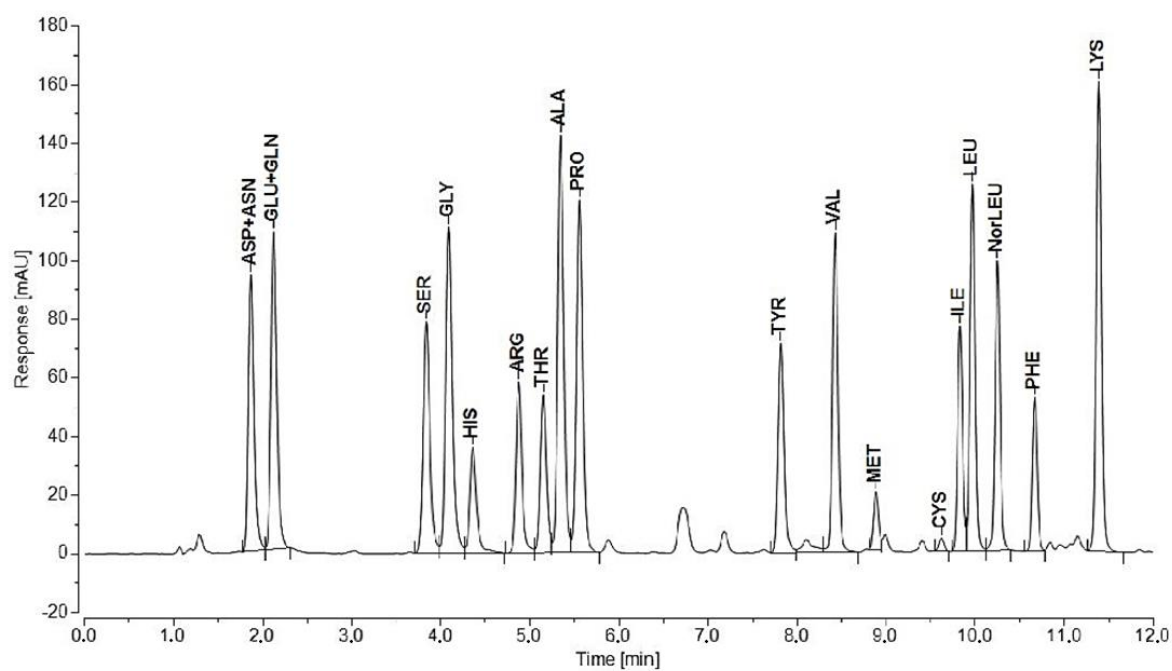

**Figure S1:** Chromatogram of (A) standards and (B) mealworm sample showing separated AA by RP-HPLC-DAD after acid hydrolysis with 6 M HCl and PITC derivatization. See Materials and Methods for details.

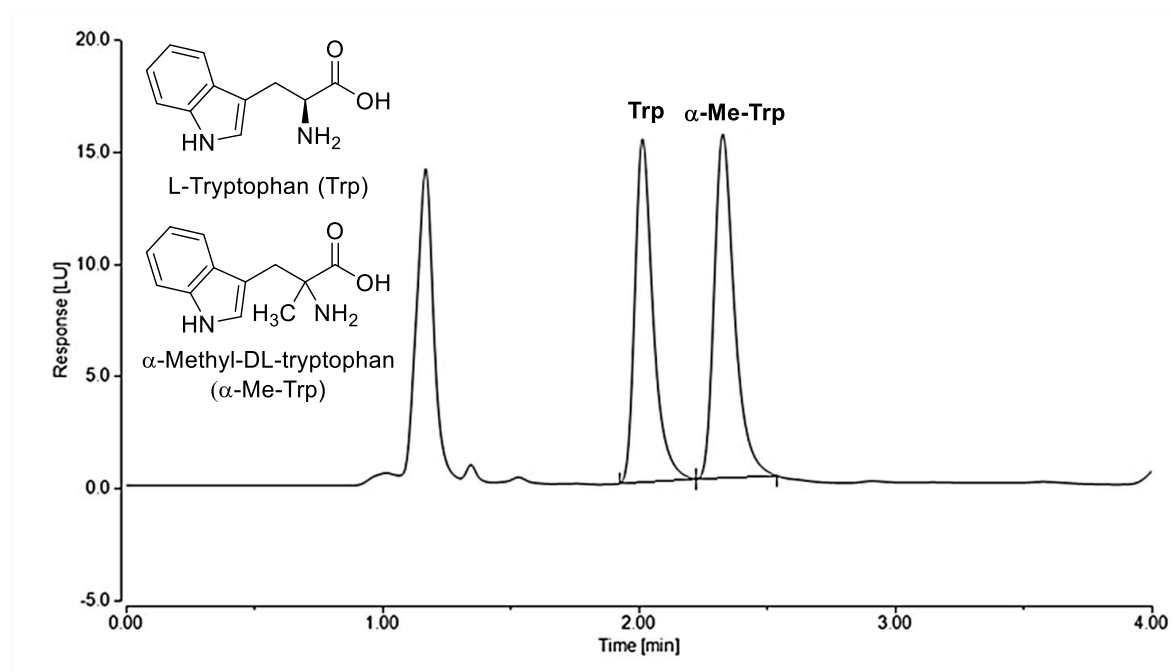

**Figure S2.** RP-HPLC-FLD chromatogram of a mealworm sample after hydrolysis with NaOH to release tryptophan (Trp; with  $\alpha$ -methyl-DL-tryptophan as internal standard). See Materials and Methods for details.

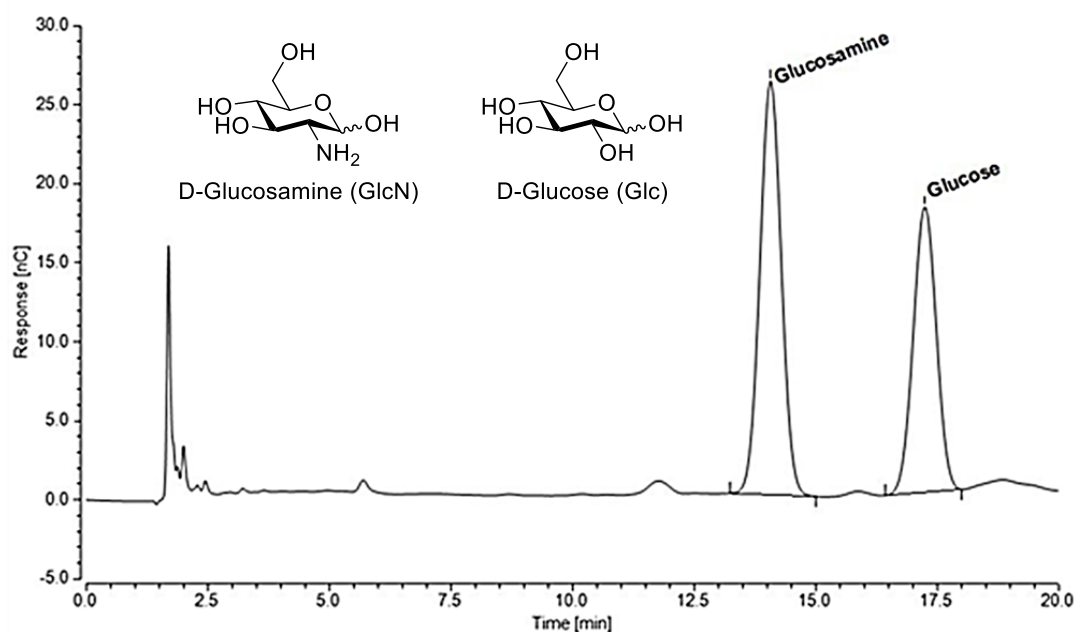

**Figure S3.** HPAEC-PAD chromatogram of a mealworm sample showing sugar monomers GlcN and Glc after hydrolysis with  $\text{H}_2\text{SO}_4$  for the quantification of chitin and glycogen, respectively. See Materials and Methods for details.
